# Supplementary material for: Experimental and theoretical studies on corrosion inhibition of 4-amidinophenyl-2,2′-bifuran and its analogues in acidic media
Source: Royal Society of Chemistry journal article supplement (doi:10.1039/c7ra08092a), 2017-01-01
Supplement: c7ra08092a1.pdf [file c7ra08092a1.pdf]

*Electronic Supplementary Information*

**Experimental and theoretical Studies on Corrosion Inhibition of 4-Amidinophenyl-2, 2'-bifuran and its analogues in acidic solutions**

**A. S. Fouda, M. A. Ismail, G. Y. Elewady, A. S. Abousalem\***

Chemistry Department, Faculty of Science, Mansoura University, Mansoura-35516, Egypt, email: \*[ashraf.abousalem@gmail.com](mailto:ashraf.abousalem@gmail.com)

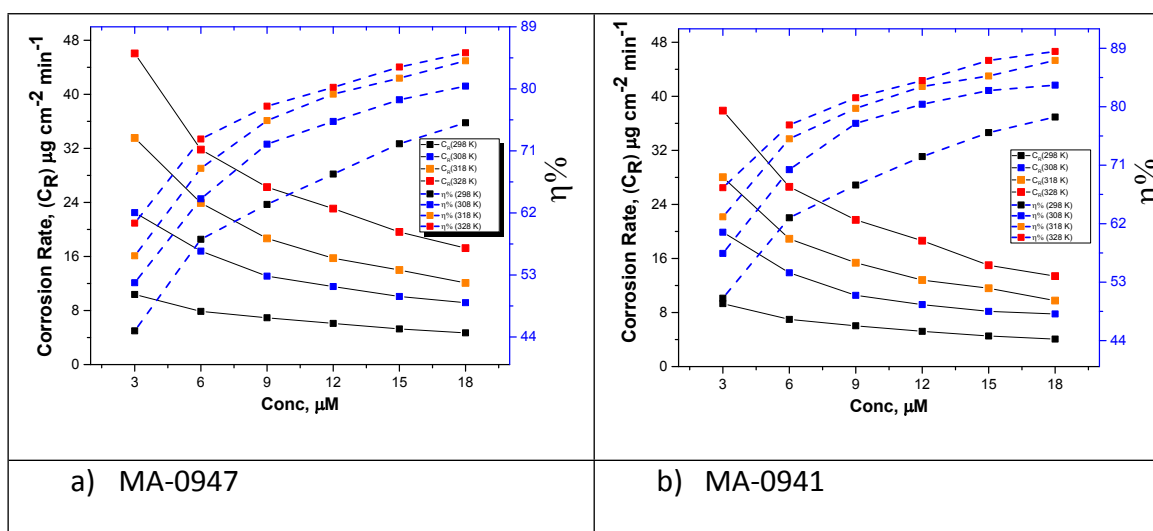

**Fig. S1.** a) Variation of corrosion rate (CR) and % $\eta$  inhibition efficiency with concentration of MA-0947 and MA-0941.

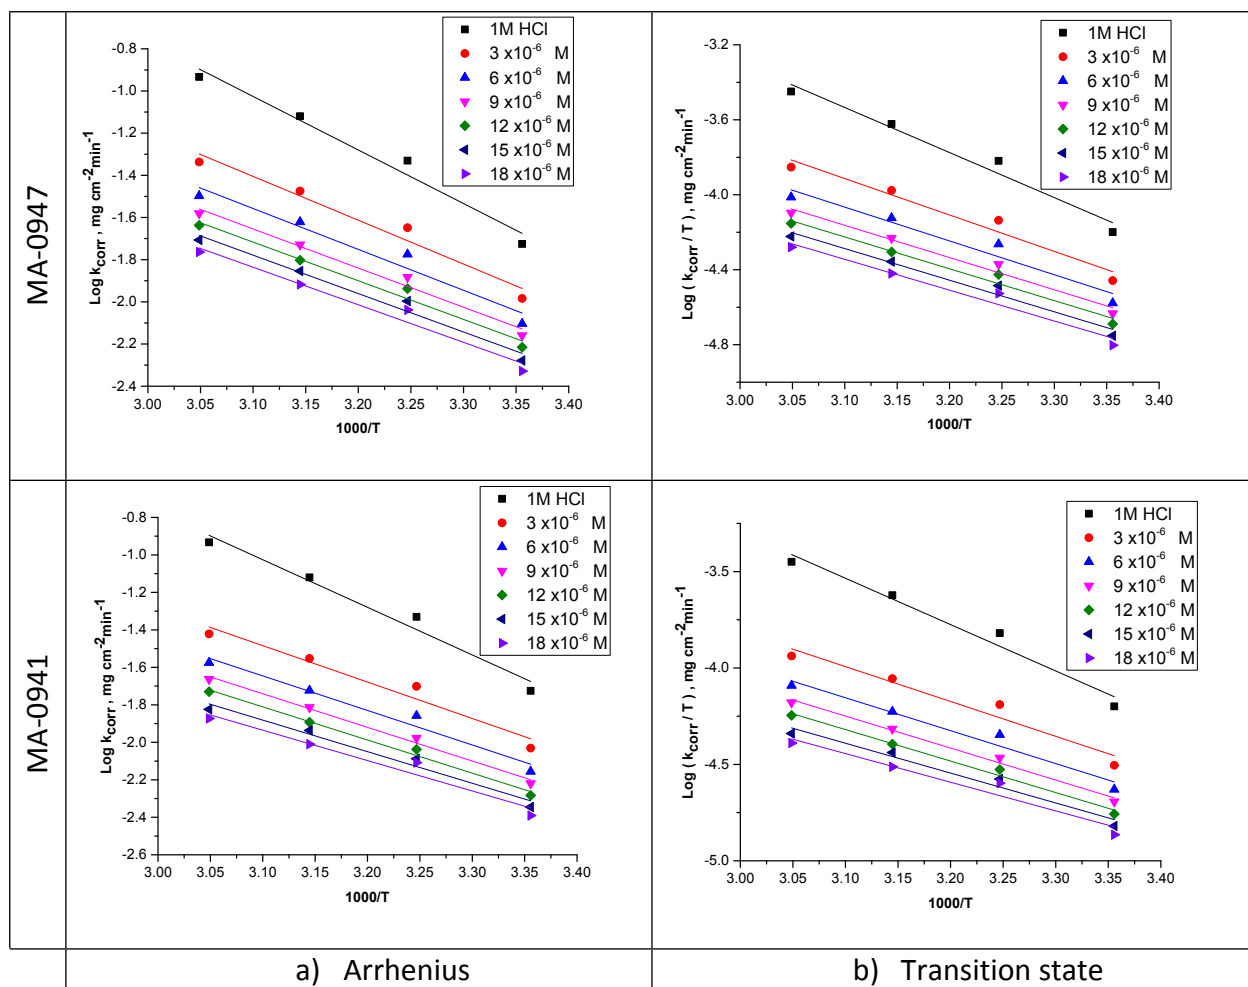

**Fig. S2.** a) Arrhenius and b) transition state plots for C-steel corrosion in 1 M HCl in the absence and presence of MA-0947, MA-0941 and MA-0940.

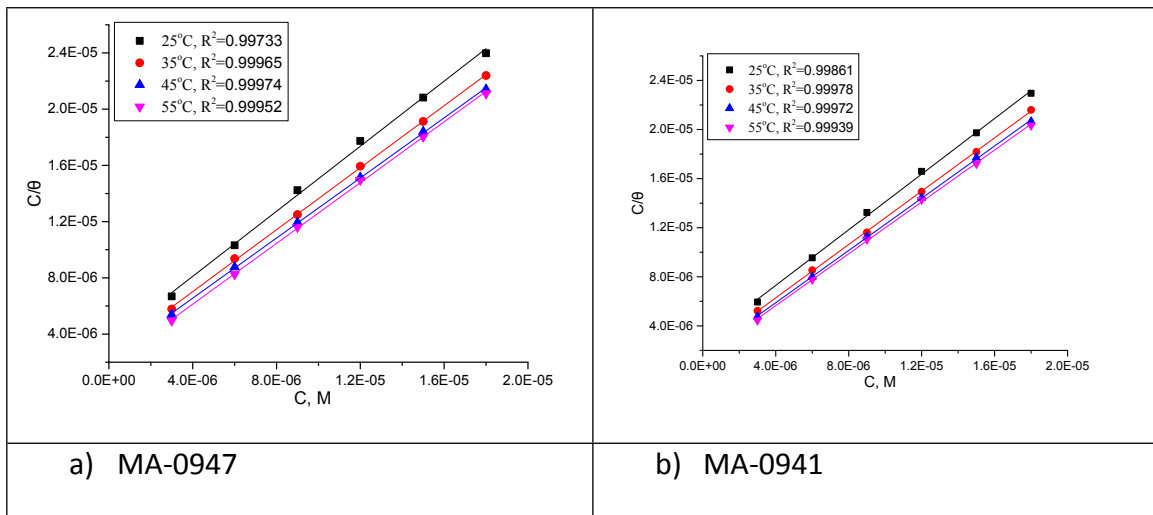

**Fig. S3.** Langmuir's isotherm plots for adsorption of MA-0941 and MA-0947 on the C-steel surface in 1 M HCl.

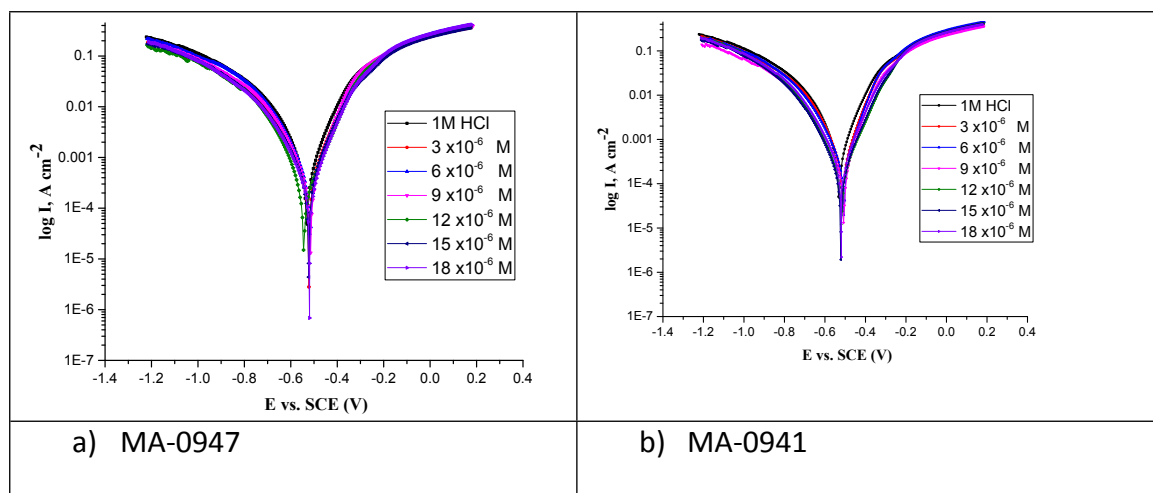

**Fig. S4.** a) Tafel curves of C-steel in 1 M HCl without and with various concentration of corrosion inhibitor MA-0947, and MA-0941

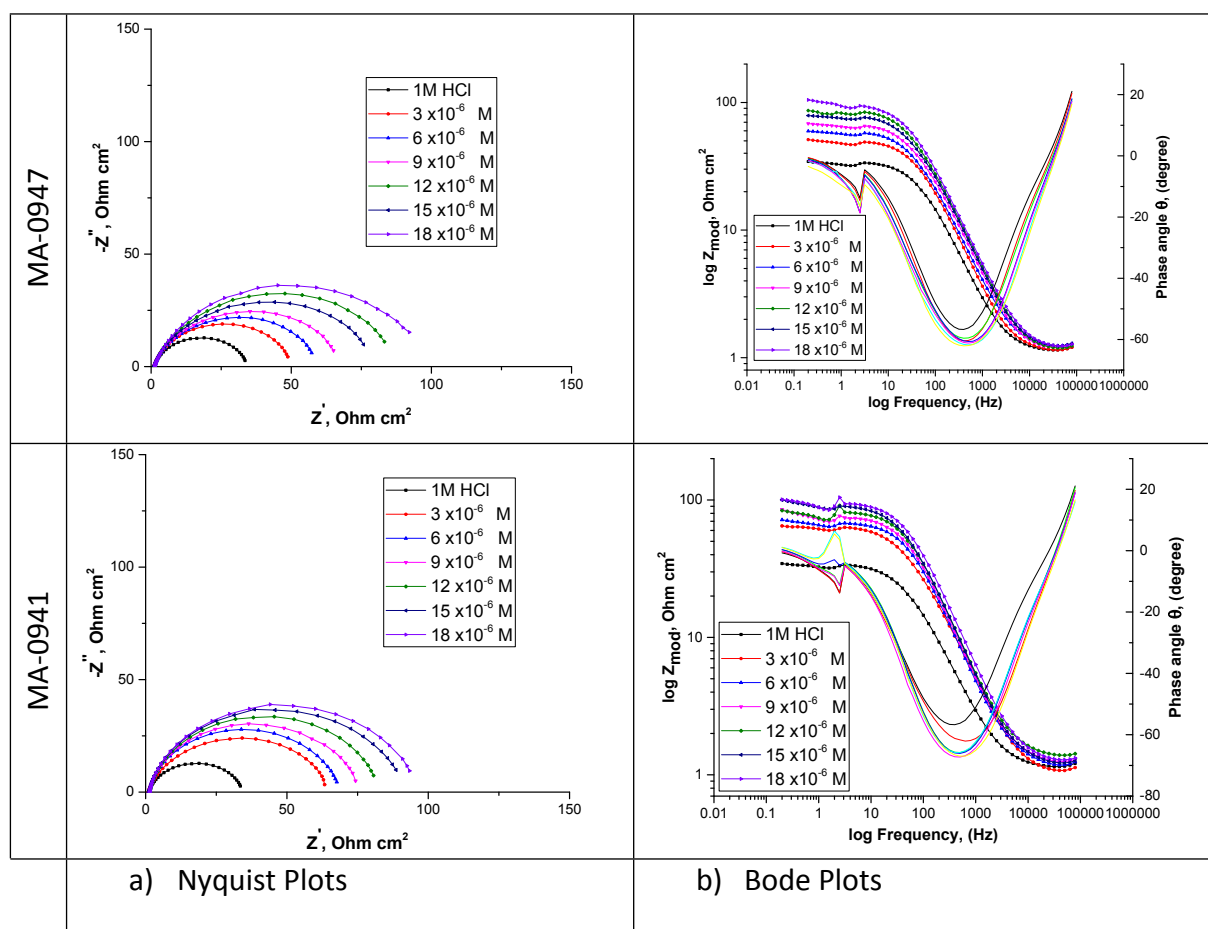

**Fig. S5.** a) Nyquist and b) Bode diagrams for mild steel in 1 M HCl containing different concentrations of MA-0947, MA-0941, and MA-0940.

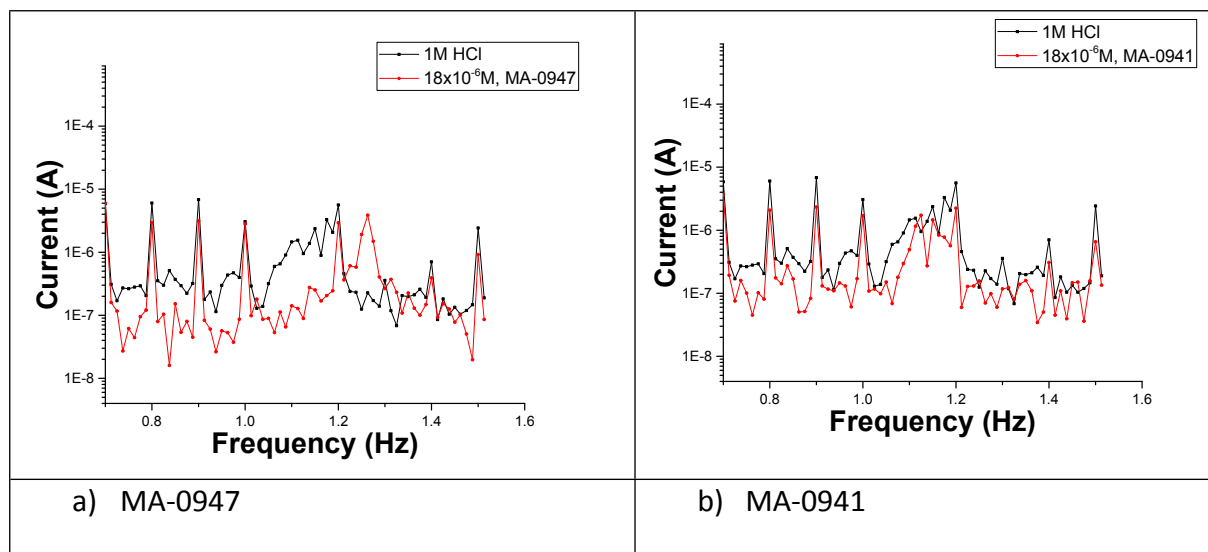

**Fig. S6.** EFM spectra of (blank and test solution contains 18 x 10<sup>-6</sup> M) at 298 K.

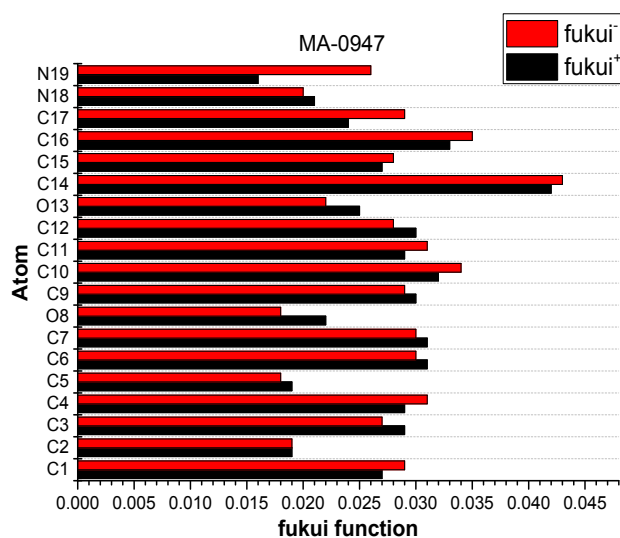

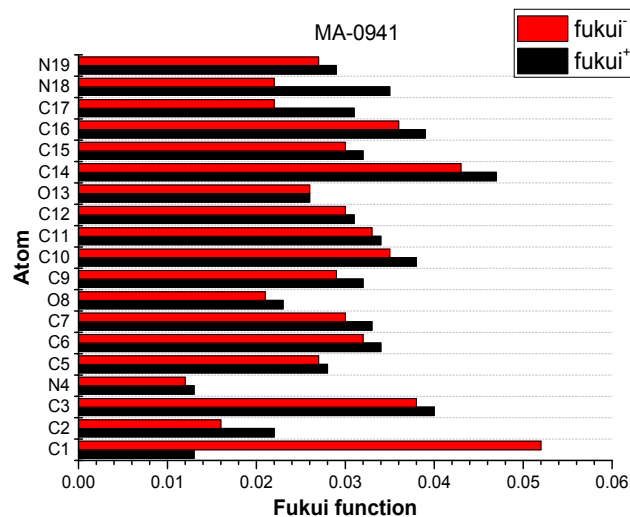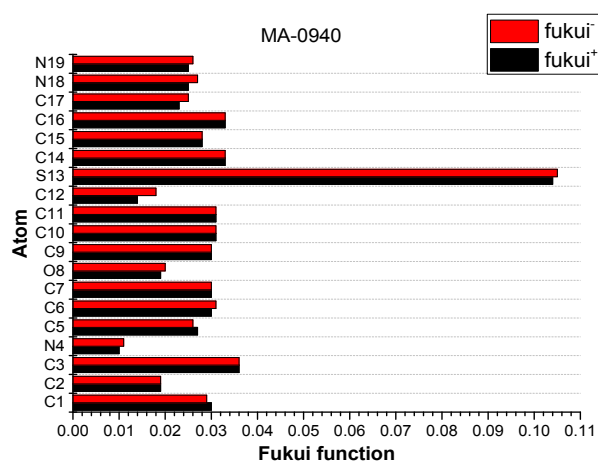

Fig. S7. Graphical representation of FUKI functions indices (DFT)
